# Supplementary material for: Population genome sequencing of the scab fungal species Venturia inaequalis, Venturia pirina, Venturia aucupariae and Venturia asperata
Source: bioRxiv preprint, doi:10.1101/477216, version 1 (2018-11-27)
Supplement: Supplementary file 5 [file 477216_file06.xlsx]

## Sheet: Feuil1
Table S3. Transposable element model coverage (bp as determined by REPET)
	Class II	Class II	Class II	Class II	Class II	Class II	Class II	Class II	Class II	Class II	Class II	Class II	Class II	Class II	Class II	Class II	Class II	Class II	Class II	Class II	Class II	Class II	Class II	Class II	Class II	Class II	Class II	Class II	Class II	Class II	Class II	Class II	Class II	Class II	Class II	Class II	Class II	Class II	Class II	Class II	Class II	Class II	Class II	Class II	Class II	Class II	Class II	Class II	Class II
	DHX	DHX	DHX	DHX	DHX	DTX	DTX	DTX	DTX	DTX	DTX	DTX	DTX	DTX	DTX	DTX	DTX	DTX	DTX	DTX	DTX	DTX	DTX	DTX	DTX	DTX	DTX	DTX	DTX	DTX	DTX	DTX	DTX	DTX	DTX	DTX	DTX	DTX	DTX	DTX	DTX	DTX	DTX	DTX	DTX	DTX	DTX	DTX	DTX
	Helitron	Helitron	Helitron	Helitron	Helitron	TIR	TIR	TIR	TIR	TIR	TIR	TIR	TIR	TIR	TIR	TIR	TIR	TIR	TIR	TIR	TIR	TIR	TIR	TIR	TIR	TIR	TIR	TIR	TIR	TIR	TIR	TIR	TIR	TIR	TIR	TIR	TIR	TIR	TIR	TIR	TIR	TIR	TIR	TIR	TIR	TIR	TIR	TIR	TIR
	DHX-incomp_VeinUTG-B-G872-Map3	DHX-incomp_VeinUTG-B-R194-Map3	DHX-incomp_VeinUTG-B-R518-Map3	DHX-incomp_VeinUTG-B-R519-Map3	DHX-incomp_VeinUTG-B-R614-Map4	DTX-comp_VeinUTG-B-G2553-Map3	DTX-comp_VeinUTG-B-G682-Map3	DTX-comp_VeinUTG-B-G712-Map6	DTX-comp_VeinUTG-B-P72.6-Map3	DTX-comp_VeinUTG-B-R204-Map5	DTX-comp_VeinUTG-B-R274-Map3	DTX-comp_VeinUTG-B-R392-Map4	DTX-comp_VeinUTG-B-R438-Map7	DTX-comp_VeinUTG-B-R88-Map3	DTX-incomp_VeinUTG-B-G1855-Map20	DTX-incomp_VeinUTG-B-G1980-Map3	DTX-incomp_VeinUTG-B-G2194-Map3	DTX-incomp_VeinUTG-B-G365-Map14	DTX-incomp_VeinUTG-B-P14.57-Map9	DTX-incomp_VeinUTG-B-P66.12-Map3	DTX-incomp_VeinUTG-B-P71.7-Map3	DTX-incomp_VeinUTG-B-P74.4-Map3	DTX-incomp_VeinUTG-B-R115-Map4	DTX-incomp_VeinUTG-B-R116-Map9	DTX-incomp_VeinUTG-B-R117-Map5	DTX-incomp_VeinUTG-B-R134-Map3	DTX-incomp_VeinUTG-B-R135-Map12	DTX-incomp_VeinUTG-B-R158-Map7	DTX-incomp_VeinUTG-B-R159-Map3	DTX-incomp_VeinUTG-B-R168-Map4	DTX-incomp_VeinUTG-B-R180-Map3	DTX-incomp_VeinUTG-B-R184-Map6	DTX-incomp_VeinUTG-B-R226-Map8	DTX-incomp_VeinUTG-B-R279-Map3	DTX-incomp_VeinUTG-B-R304-Map20	DTX-incomp_VeinUTG-B-R341-Map5	DTX-incomp_VeinUTG-B-R343-Map5	DTX-incomp_VeinUTG-B-R38-Map16	DTX-incomp_VeinUTG-B-R437-Map6	DTX-incomp_VeinUTG-B-R47-Map7	DTX-incomp_VeinUTG-B-R509-Map6	DTX-incomp_VeinUTG-B-R514-Map6	DTX-incomp_VeinUTG-B-R53-Map5	DTX-incomp_VeinUTG-B-R567-Map4	DTX-incomp_VeinUTG-B-R58-Map4	DTX-incomp_VeinUTG-B-R587-Map3	DTX-incomp_VeinUTG-B-R612-Map7	DTX-incomp_VeinUTG-B-R681-Map9	DTX-incomp_VeinUTG-B-R715-Map3
Vasp_2202_Ariane	0	0	0	0	0	0	0	565	0	253	1493	0	0	302	0	0	0	1061	31	342	0	0	0	94	0	0	0	0	0	0	98	0	0	0	108	0	109	0	0	116	100	0	346	0	320	0	0	1022	93
Vasp_2349_Doug	0	0	0	0	0	0	0	881	0	186	1305	0	0	838	0	0	0	776	31	365	0	0	0	0	0	0	0	0	0	0	98	0	0	0	0	0	296	0	0	0	0	90	625	0	66	0	0	1532	0
Vasp_2353_Ariane	0	0	0	0	0	0	0	882	0	188	2095	0	0	492	31	0	630	339	31	342	0	0	0	0	0	0	0	0	0	0	0	0	0	0	0	0	0	0	0	0	0	0	409	228	326	0	0	1543	0
Vauc_2371_sor	1243	1942	155	21462	21014	0	16797	3966	0	30615	28941	364	1160	11361	27690	0	40786	25630	7560	9133	55	0	57	6837	26393	1467	18111	39	8370	1467	3679	4416	136	2570	8651	5307	377	121	13578	221	463	59991	2379	278	262	766	2923	4673	26
Vina_2222_CAM	708	4289	780	10610	2967	5342	4719	15551	601	2909	3166	10127	6385	1914	583	2068	306	1337	1392	1567	248	3407	554	2213	27405	210	6009	460	3218	5773	4822	2652	7601	2199	1268	855	523	487	4244	10191	7448	14757	934	118	2408	4741	592	3398	3328
Vina_2225_CAM	37888	35829	3628	47865	37930	32452	43699	30912	4540	23814	9704	46137	15788	7730	10515	9830	13108	43486	4558	9419	11509	9525	2900	47259	105400	8945	25929	7428	15480	18741	33731	30706	29677	14809	50773	10438	10589	15429	50336	55085	62924	90604	12874	6182	5728	32556	24941	19387	40525
Vina_2226_CAM	7706	13227	4298	40285	13169	17320	21332	35871	3615	17477	11585	28673	9550	6866	5252	5686	6971	10738	2219	4905	3087	8164	1709	8752	81923	2793	15699	1068	4610	14939	14961	10338	19578	7856	8910	4668	2570	3604	11930	22808	42207	41946	4969	1692	7394	16565	5704	8734	10378
Vina_2446_CAM	43916	44702	2692	51295	42170	34972	45166	32425	6113	32304	10056	55396	16923	8066	15400	9221	23410	57158	5599	10974	11162	13307	2579	61664	105144	9245	32279	15367	17587	19025	32833	35414	31778	14324	68390	11007	14205	22385	52714	58037	74410	96540	15028	12399	5736	38881	35291	20578	47411
Vina_2447_CAM	32008	32100	5171	51449	36800	17993	46983	31644	7866	32700	7896	52581	17405	6742	7478	9568	8578	32186	6776	9931	6366	16694	2713	40820	87125	7857	24189	7818	9895	13954	34921	25223	25245	6215	52014	11445	7896	11368	35244	47871	59886	72299	11297	4598	8104	30844	15886	10717	38454
Vina_2448_CAM	24761	26286	5363	52166	32425	16234	22080	32652	2614	24477	12499	38291	6577	11454	9428	7203	8886	22168	4715	7666	5238	10483	3287	27573	73571	6667	36374	8303	11912	16436	24040	12045	32487	4999	46105	10061	6316	4233	28597	25746	66597	86869	11355	4342	6280	21194	14946	20105	22241
Vina_2449_CAM	25129	22786	5941	38213	26959	24379	17562	36494	6030	17991	4067	33263	5631	12122	7799	2513	5269	17295	2800	4776	4700	3707	1983	21147	56628	4997	16832	4881	8132	14066	19741	16753	28826	4644	31039	9937	8790	6517	15911	22954	34464	60449	7878	1231	8132	20068	19494	15259	18003
Vina_2450_CAM	27803	25895	7616	59722	45669	23782	29323	40978	7116	39012	12406	49618	11358	6839	14090	8631	18351	39712	5916	8998	11948	12997	2545	54274	115113	7041	29404	9865	17192	20898	26050	28907	27207	13168	49992	16416	14243	16874	49353	72768	91056	89602	12113	10237	10069	23766	32298	17218	40983
Vina_2451_CAM	35687	42687	3635	34425	32397	27750	39675	38761	6851	36060	13651	54986	17937	10922	8356	13795	17143	30736	4931	12770	8707	19882	2915	46867	97118	8530	40396	4484	13288	17759	36305	26659	26435	8313	53320	10355	9271	8171	30146	66190	64546	77413	12676	8319	8797	33542	26233	20459	43104
Vina_2452_CAM	19044	22998	2971	46236	32319	17836	21922	36634	3303	15889	3404	31770	5629	9014	5601	13057	4271	7443	2596	5129	2353	9649	774	19374	73314	4525	25224	2549	6070	13147	22919	12300	31689	3815	21167	7004	5290	4083	12895	26724	39071	50420	7187	3698	4574	20094	9405	9832	17241
Vina_2453_CAM	17745	13282	5035	37536	14276	17721	32907	26908	4957	12804	7777	39599	11020	8326	6812	5820	6413	17452	3422	5251	3883	13749	4642	22466	95755	4114	19690	2343	12088	14514	23493	19719	30756	4969	18872	7536	6228	5020	17212	34359	31300	54497	6976	1476	7492	18504	13740	14260	15160
Vina_2454_CAM	36644	19740	4325	61831	48672	21031	31687	44023	7924	45166	18783	54563	12956	7214	16707	10149	18326	45398	7596	10587	11921	14914	3119	65794	102795	10646	53507	15133	17997	18687	40433	29496	29747	15917	66055	13142	15689	16110	41444	54958	85273	84921	17977	6756	12430	24211	28076	23623	41295
Vina_2455_CAM	15112	25128	2678	47189	27066	24450	21859	35460	5113	15637	8702	44365	12737	5175	7130	8379	11344	13348	3496	6886	6462	12759	1778	24043	85198	5500	14006	3268	14962	17307	21418	13742	21708	9406	23500	7653	8585	4607	10678	32267	45443	61261	9128	2743	8344	20782	5660	10003	11485
Vina_2457_CAM	60	2996	1893	12977	5526	2182	3253	9259	62	2605	1320	9890	2978	3418	426	1262	252	448	305	769	26	1275	226	602	20502	394	1614	78	2317	3284	2802	1724	8954	1539	1039	303	114	265	1830	6697	5142	1877	428	157	1925	2499	164	2974	1125
Vina_2458_CAM	782	1059	1805	13230	5197	7235	5850	20724	1552	728	4952	17428	6763	6548	1084	3315	2281	2709	2348	2292	3389	3441	1329	3959	41539	561	3922	674	1579	10367	7051	4370	8381	2053	6367	1258	971	354	3736	12070	15265	10042	3244	506	4148	9802	1266	6444	1512
Vina_2459_CAM	1959	3464	1906	14589	4494	8811	6171	20432	3369	2314	6149	20144	9790	4858	1951	3191	3099	3186	2176	2800	1523	7151	2199	4139	57639	2160	5409	627	5577	8915	7566	3712	12886	4309	3674	2155	2324	1818	4725	14604	15147	18911	1567	532	4561	11287	2140	9934	4870
Vina_2460_CAM	25176	17375	5920	43418	20311	20255	31283	34287	4580	23819	6709	44380	8738	6777	6919	4033	6350	21214	4955	6524	6710	18352	3309	23853	85096	5448	15323	5180	11682	14742	30209	21380	32092	7914	38328	8777	11706	8688	28648	49648	55071	65416	8094	2577	7697	24891	14213	17227	25501
Vina_2461_CAM	3034	18224	2769	30032	16082	11420	9839	18456	1022	9810	1472	12624	12290	2794	1206	2167	727	811	1135	3446	1537	4693	2175	8692	20931	1124	4678	0	3048	10048	14454	8616	11730	3356	11154	3578	2822	1233	10648	15178	14647	16471	3625	530	2900	10962	4618	2394	10722
Vina_2228_CAP	578	10161	166	18376	13569	7057	5346	12878	4054	5719	1344	8191	8487	3824	2029	2067	718	5583	1622	3407	1418	5173	1987	8971	9891	1508	4981	4062	2352	11983	11550	13190	8243	1903	7933	3375	3146	1956	3382	7907	14483	11341	4008	2698	4136	12146	1227	1863	3676
Vina_2229_CAP	23013	23717	1601	27459	26788	16696	33720	39744	5203	17168	11637	43542	6574	7670	9955	4511	9181	19439	5315	5725	4500	8318	4234	19553	79495	5386	27058	4309	6789	18288	22769	11223	43512	5682	31300	8682	5917	8162	20160	31705	40841	72346	10624	2970	8905	21067	16126	12786	16869
Vina_2230_CAP	18340	10125	3433	35647	15385	21299	20243	36020	5176	12899	6315	41596	7545	3938	7166	4401	5963	20054	3289	4404	3482	12157	3458	18070	44611	6637	23235	3171	8679	12580	26202	12787	30872	3436	35470	7869	5602	6131	20863	19418	38609	68242	7212	1478	8257	16171	17266	11992	24011
Vina_2232_CAP	6789	12795	4395	25799	19550	11074	20213	26903	3651	10302	5195	17222	5773	4119	6445	4501	7924	12478	7529	4784	2348	11070	1559	13733	52660	2755	11267	2406	6915	13827	18926	7816	24182	7831	15968	5649	5640	1606	11470	16133	29239	31032	8332	1451	4313	10540	9920	9021	13234
Vina_2462_CAP	6244	12654	1261	25425	15133	7686	7717	18542	957	8668	4573	10936	4402	4886	1484	2505	2450	6406	828	3010	2082	5009	1533	5027	37777	1741	6822	555	5432	10916	9019	4946	18325	3443	3708	1685	1402	923	3659	13200	16460	28687	1902	752	5036	9338	2723	4873	6640
Vina_2463_CAP	20227	36191	3645	38177	27251	22753	25754	28818	5265	30050	9700	49024	8986	2946	7600	7904	6918	27864	4105	7024	6287	7415	1916	36799	76230	7092	21411	5522	7776	14898	30250	17001	28819	8995	35442	6229	9039	8090	28296	50674	63330	54230	7676	7164	8433	21993	24612	6408	13396
Vina_2464_CAP	8210	9459	3571	24724	9301	9417	16715	21203	1434	12660	2558	10818	7683	5396	2156	6310	1628	6107	858	3697	1070	5874	1450	2803	52389	2558	18685	901	6054	9065	7420	9313	15474	2079	7023	2258	1877	1901	7691	17316	28865	20611	2984	525	4780	12874	4379	7929	7594
Vina_2465_CAP	15028	16384	3837	34414	17934	16492	18048	24884	3018	14663	8927	34354	12008	4548	5671	5699	4934	10350	3729	5733	3767	7970	2921	23159	68302	3969	19815	2902	8031	14155	18241	17131	24506	8751	19928	5377	6504	2093	15191	35792	48149	44025	7288	957	7071	23069	6099	12601	12536
Vina_2466_CAP	18074	34123	5694	40527	26256	19557	16009	31819	3447	10325	4587	38935	8077	4691	7020	4045	3451	16799	2369	5914	7714	6941	1739	17658	78129	4866	23711	4653	8364	12492	17672	10577	21187	1123	33723	6004	6949	7226	24940	18551	52205	53998	6282	4470	5484	17969	16858	8508	21783
Vina_2467_CAP	13487	22513	5279	52943	32593	14153	32137	21732	5955	28556	8326	41397	6897	4608	8343	10759	6967	15257	2858	6557	6319	12645	3303	20252	74648	6084	32111	6009	6347	12841	24500	14895	35803	1290	31346	7208	6384	7014	26283	29438	40806	69362	5864	4301	5074	21152	15233	11092	20056
Vina_2468_CAP	26860	22436	1847	46872	28005	25677	20355	40528	7645	17615	5851	42879	15532	7614	10902	10436	11797	18623	5835	8616	4177	12981	3594	28427	75681	6523	28825	4806	10482	19653	23048	13260	38232	5182	35610	5456	9894	7513	29053	27999	65624	75266	9848	7324	6029	28369	14410	6617	20227
Vina_2469_CAP	1859	6441	3627	24242	9234	9263	9605	16700	1948	8785	5352	10067	5573	3536	672	3964	903	6231	3310	2571	1904	5279	1413	1699	32074	1163	7051	930	5705	10418	7782	4921	20884	4128	3424	2133	1384	1079	1335	6265	18371	15603	2442	230	3455	8506	2276	7928	9253
Vina_2470_CAP	13924	15420	3069	36340	25593	14962	16265	19027	3560	17835	2919	33756	6928	7963	5771	4961	3224	17172	3258	6738	1685	8041	3199	24533	66127	2202	12880	2121	12835	10870	26834	13037	29245	6751	38912	8559	11286	5751	21256	32911	40233	59052	6163	2209	8875	11102	12641	14961	12356
Vina_2471_CAP	3856	13007	870	17405	4738	3906	14647	17961	1230	4309	1571	13615	5748	4982	1130	1577	170	2015	1069	2791	403	2835	1279	1758	38614	858	5263	55	4712	7170	9200	4327	16415	2170	4675	2510	372	1237	1590	10888	19780	15473	2588	370	3724	5447	2409	6224	6868
Vina_2472_CAP	6601	16426	3616	25855	12659	14714	10240	24812	1278	4383	7691	23326	8214	5889	1121	3662	920	5865	3055	3803	1115	7615	2956	5508	43710	1481	7839	294	7649	10287	15902	7559	24592	2786	4104	3263	411	4420	7650	12703	27529	19620	2860	254	5076	9186	2768	8532	9457
Vina_2473_CAP	1375	1154	1216	19758	5603	8690	24568	18707	1891	2967	2849	19983	4779	2890	1177	2659	880	6139	613	2836	666	6643	585	3029	60513	739	10995	0	3175	8748	13546	4479	15766	4102	4445	2232	1062	281	4039	21332	20073	21201	1896	240	4175	8509	2110	7422	5992
Vina_2474_CAP	15077	15739	3286	43699	27631	14470	22697	37862	4860	10911	3273	30046	5165	4068	9168	4793	14319	9319	6630	5003	8198	10163	3470	18268	62940	3505	16477	4968	9629	13974	18160	13829	37261	3607	24209	6244	7905	4924	16601	21555	43649	65833	9634	2128	9110	21698	7512	13628	17476
Vina_2475_CAP	20242	28751	10014	55773	35807	14940	29058	43602	5345	16910	3596	32723	5996	3994	15637	8806	17658	23302	6594	5544	11275	10329	4009	35096	73976	6940	22132	10488	10528	16721	27917	21568	50354	5057	42059	7621	9164	10612	27339	21708	57360	87036	10593	5712	9994	17747	14214	14927	24193
Vina_2493_domASIA	39790	76356	13074	73397	76196	24493	24715	44588	6814	44044	9643	39314	7875	9693	39714	12956	33844	305078	13771	18581	55886	11061	4692	140453	85268	10772	84212	77476	20533	36058	28819	17931	41194	7691	81494	8520	33392	84273	118634	47090	75079	101085	35258	17162	8270	20670	35836	14270	49912
Vina_2508_domASIA	64102	35031	2946	51117	54408	54233	30701	44905	19026	36173	11756	58790	7666	26648	36946	11276	29719	384094	13695	12632	59341	7398	5856	137221	162440	6739	54827	68511	5067	41141	31744	24563	59565	19633	138505	18057	24570	86905	42351	82327	91905	78177	42142	48263	7108	24101	24284	23761	60102
Vina_104_domEU	20631	33693	8673	70010	67983	27750	23810	28125	10187	71044	4902	49219	10843	13306	30696	9162	16466	363805	4182	4654	51413	9986	5353	59874	83810	8099	23059	61462	3083	16101	22910	17640	26960	5201	121300	13158	26333	84934	58107	81524	119607	50788	25155	30630	10831	14520	38674	27835	26419
Vina_301_domEU	51807	13509	4103	46990	42696	33501	39869	29711	14497	52017	10796	39134	16013	11533	34318	16627	27769	380075	16927	13500	88009	11888	4671	92456	100207	10240	42369	59724	12340	35589	39628	36385	69391	9902	94752	10995	23469	86774	42006	64297	73526	75788	27428	19051	7900	25764	30830	17815	43688
Vina_2492_domEU	32374	52609	5788	66751	52545	29390	28260	40959	23711	62387	10774	38881	5263	24492	38019	17092	31298	324630	11397	12878	56260	9393	6251	67145	109461	9456	49936	59247	1733	38834	28064	22345	43957	16164	181685	7722	25544	86336	60840	22776	111255	70231	24352	25801	13422	18735	29349	25333	47880
Vina_2498_domEU	22450	46561	202	28019	38848	34045	74488	31667	8670	62718	13889	29001	8696	9672	40968	12788	25631	403707	10050	15296	82360	10033	5437	167459	138919	8820	42376	51139	12147	27201	34440	27369	58155	6314	144665	10411	39357	41925	57312	40117	104296	76932	22265	24510	6632	23840	16844	24338	26014
Vina_2499_domEU	32106	24612	1321	52096	55800	66447	19814	40888	14313	46352	4921	44897	11350	13550	22492	10773	20873	358881	7191	12843	55415	8710	2984	144304	128376	10373	22625	71792	5474	17973	29921	16247	47585	4593	145928	8266	20621	62199	55393	92982	90738	40295	31714	41577	8089	17869	34599	23191	45630
Vina_EUB04_domEU	62902	49772	9273	42667	41047	22291	84063	44805	12497	159361	18115	66212	14367	8054	52650	23438	34319	380749	27741	9191	81284	11195	5424	181107	201577	9181	59138	62152	8515	41460	28918	16699	78227	22088	200959	13382	25341	125451	105535	92181	196178	98409	33188	55793	13058	18613	45278	126576	59347
Vina_1286_RVI6	27008	52437	4052	34280	42792	25365	30384	37526	19484	56478	10648	40441	11162	11746	35190	15096	23220	325931	4507	13751	58600	9840	2319	133746	123910	7915	41889	75939	2794	26807	37346	27662	43632	6102	97656	11466	28695	69543	98954	68937	73219	61119	20664	40448	11973	29139	25572	17545	55746
Vina_1680_RVI6	0	14024	0	7997	9839	19857	11020	21826	1394	6866	3902	20488	5463	10744	7935	10248	1698	105735	1985	6918	2314	7246	3304	13266	27215	6395	6129	7311	855	14145	13522	20029	5875	3811	34822	8978	15384	13618	10126	12437	24122	15907	7850	5726	4017	9007	1283	5355	9599
Vina_2199_RVI6	25406	26241	4465	35070	35391	24057	19923	29992	18069	92716	7863	26863	16832	7610	27843	6538	25750	379336	16780	19056	28776	12197	2868	114797	99497	7543	60934	59976	5303	18332	48392	32449	45941	449	128457	16299	39557	114579	124836	47487	96584	60624	25531	34209	9540	36088	42123	24785	27900
Vina_2491_RVI6	25511	20060	2895	46276	46645	39439	29604	34314	11194	43516	16313	32187	13598	5992	31247	17494	26535	391955	25217	12169	54855	8403	4585	83926	150581	9500	38839	81274	14856	33900	51435	31061	54310	7821	177065	9831	36492	111111	59752	39642	103019	88643	28706	24943	9292	35784	16468	23075	69649
Vina_EUNL24_RVI6	21536	65034	3286	45240	63791	29904	25612	23604	18308	67147	2228	29952	14822	10958	27913	20940	13162	434948	5519	8297	29818	4902	6151	105839	94315	9781	53328	69907	2828	20823	35830	22446	30890	4310	106117	13862	27192	58577	39484	77010	104200	50395	22403	14083	22985	22968	17181	21335	28323
Vina_1066e_flo	21351	37933	2998	43093	45605	29457	32278	40752	20703	66392	8214	53075	9931	17305	36750	23956	23612	410350	6630	14171	37812	15268	5366	109713	104533	10667	52956	60019	2772	29504	49137	26656	44866	7252	152584	12480	36979	70238	75250	44553	91671	66444	18084	32591	11198	36864	35407	18222	56718
Vina_1180_flo	26868	70549	3047	45483	49280	27611	35245	30208	17171	50765	5512	43951	10913	17730	27241	19965	16656	357229	4628	12982	40598	8448	3352	100056	92926	9214	31189	50229	3785	21545	23956	20177	27197	8564	110958	10867	27225	97957	60743	71004	111788	68019	16371	24789	9221	27950	12577	20704	53102
Vina_1393_flo	20249	48565	353	26378	36005	24677	30143	33941	22614	98724	13291	54354	12956	15489	33829	10295	35507	402307	16787	11598	57890	12811	2522	148553	133529	6374	40694	44704	6113	28323	46940	24313	34910	8407	124007	10843	35926	72300	92305	64565	88905	54998	23785	26873	17325	32476	39460	24955	43025
Vina_2490_flo	213	53	0	6549	0	7885	4279	8288	2299	1935	1053	6834	6445	4960	2305	2032	675	29447	3270	4571	1045	2927	2953	3883	7898	2597	2963	1266	91	10289	13667	4400	7202	1706	12130	2502	7637	2423	3321	521	11754	7641	4045	544	4575	6121	3129	4433	2952
Vina_2263_loq	11262	2775	0	15187	3604	11281	18204	9581	1902	7036	3673	13145	4708	970	1913	2803	2414	39120	3006	5773	1841	2158	5352	6059	20464	2390	4074	13629	2221	14324	7549	4102	10278	1686	10366	3567	8881	10192	11517	8230	14579	18816	7828	4224	4569	5911	12870	3884	3339
Vina_2503_loq	124698	31813	1064	61124	67447	37557	22120	30838	6593	66640	23529	55107	9356	6881	37416	18085	28535	342695	8733	11104	40429	8904	6174	63641	112247	4869	55240	78218	17635	26759	41173	20587	34607	6951	112408	5389	24141	77084	34617	17185	76917	94416	21618	31668	7961	22574	39196	22798	67193
Vina_2504_loq	138616	31187	939	64009	63446	37288	21714	29268	6607	61576	19272	54563	8492	6802	33101	18602	34499	367508	6593	10770	64687	8141	4697	45901	98394	5181	54826	56022	17239	26528	27233	20589	47187	6721	113500	5929	23098	75458	46690	17166	94839	100508	21170	18482	8119	24740	19833	24133	67856
Vina_2505_loq	105998	13352	259	43454	45770	40833	16735	26045	2696	70846	24127	92085	10582	12695	29939	21415	36784	392022	6551	12032	59431	5069	3843	68154	90644	6568	30853	67919	32531	28030	19402	30726	29221	10033	122566	4159	25465	48858	28250	64046	54638	82193	22297	17888	8588	21285	47003	23920	78717
Vina_2506_loq	7935	194	0	10416	103	6873	10999	7606	2379	4403	4608	9996	1856	4870	832	2101	1251	61951	3188	5566	3030	3275	6215	3968	13481	2469	3624	2181	186	12881	6247	2672	10760	2058	16725	4364	6952	8674	5227	14138	20093	13489	7363	630	6184	5106	6199	4071	3380
Vina_2389_sor	19291	18586	5837	27028	22702	32221	9264	18656	5596	29935	21838	28201	6462	7682	11043	6150	14471	28214	6189	3176	13246	10998	4488	38494	59687	7106	21726	8688	17078	20009	36975	16341	32276	4526	34386	10638	10292	12259	22127	25750	42885	62849	18275	4712	8155	27120	21030	20896	29610
Vina_2484_ori	21932	42647	2465	28244	37627	21991	30276	42729	5357	48677	15658	36031	11731	2170	32298	25961	33878	455153	15663	15481	65417	15707	1343	110708	94483	12175	36719	124794	10793	29886	27948	21532	52357	4643	128594	14998	32886	110101	64641	57391	102638	106533	24420	58974	7643	21345	15237	23768	47851
Vina_2485_ori	533	172	0	7470	37	4281	5048	10976	2084	3187	398	8464	3938	1009	3271	2616	1486	56368	4525	7188	3116	1124	2486	5720	8308	2424	2519	4513	116	10158	3615	4028	5285	1254	10345	3673	12260	4172	7294	3061	12399	3507	7590	4207	2978	3922	2612	4123	2137
Vina_2486_ori	26715	73311	5958	53232	49999	23227	16279	35029	20815	76478	12106	47484	8949	4026	39925	19327	34686	478198	20022	15260	59720	31307	4009	125558	112530	11367	32301	116853	7035	32975	47449	25043	72148	18178	208369	17003	45197	99091	81144	72054	69442	104539	28891	34813	16711	31577	25363	24018	34363
Vina_2487_ori	30940	22541	7408	79354	79595	33133	38218	54086	22941	94148	12505	57001	9928	7725	38118	18209	56685	610317	12865	20626	90532	29544	4283	172978	116708	11530	29613	116363	11879	37029	38719	44411	59391	6626	195841	14315	39421	79173	16524	63486	131427	107202	34397	26996	7673	24776	31669	23428	24307
Vina_2488_ori	16430	54497	3664	110593	86002	14109	25969	40890	5636	46300	14828	40502	7134	5830	53118	26492	36013	584761	16572	16693	93460	21256	5414	75091	133941	10110	59499	69771	11244	32060	25513	25029	71874	12332	138557	18355	30377	97315	85943	98149	88919	92405	35883	20274	10746	30322	41156	24531	31345
Vina_186_pyr	34613	47582	508	34054	35743	51220	37026	29333	7189	55013	24904	66550	4739	10238	52825	16694	53479	602617	6547	14261	52710	7207	4972	90805	98365	9743	22305	36570	5997	27268	17648	12093	18329	5175	135089	5552	25547	43541	39820	75653	55838	76328	27905	12798	8350	24212	17453	10787	39484
Vina_1669_pyr	22945	24524	1029	18942	24858	24814	17837	26909	6132	21877	15911	31698	4584	9414	23027	6305	14406	36024	4890	10946	14133	7243	4099	39536	58891	7489	17198	6867	6073	20904	16129	12331	14423	5046	32851	7105	15872	9348	23037	35873	40059	47120	16338	5695	6605	19539	21181	6862	32821
Vina_2266_pyr	29772	53559	676	22590	27212	21058	30731	28376	7183	36748	10569	51185	3708	9976	26347	8389	28081	599342	4858	12124	23999	4224	5420	45274	72202	12359	23356	9906	7411	19402	12900	11305	9026	5157	78394	7309	18137	53173	26683	58677	45288	63744	22916	18166	6482	14584	25998	6863	46768
Vina_2269_pyr	29280	35752	1500	24384	33229	30542	15351	29322	7547	36442	18255	36885	4777	10216	32168	7530	28196	127834	5309	13596	27489	7206	3421	61484	59642	8192	25054	13228	6023	20194	17459	12561	14990	5220	48374	9884	23994	23911	37485	45087	50718	53526	21943	8469	6474	18647	34804	9134	38839
Vina_2507_pyr	622	6647	2846	20340	14314	10092	5257	10360	2748	3615	7688	11585	1171	5485	3232	2946	1533	187869	1916	6202	3002	2890	1038	7753	36588	5689	11570	5054	747	13445	7221	5293	5929	1581	12670	5800	14907	6989	5648	9756	24485	22349	11373	1152	3794	5422	5190	2421	11372
Vina_2478_syl	35000	7075	190	27865	23056	25274	15558	30489	15997	11863	8534	33231	6713	7382	20000	12666	15314	225110	6116	9807	21274	2990	2198	76706	75066	8312	21661	37175	5509	18572	31539	17450	14775	1569	92818	9764	15388	48098	37417	48548	76601	65220	20405	21029	9718	18180	21719	16320	40611
Vina_2479_syl	32850	19986	2931	42608	49435	34201	22109	29705	8460	50124	13767	43012	14224	11712	34244	16047	30263	294101	11324	9440	58997	8380	2678	78774	93891	7948	35796	80115	8231	30733	23691	32600	47219	4648	112927	9729	18121	98114	79254	51086	97467	44977	34996	17525	10389	14635	16921	20117	53318
Vina_2480_syl	39579	7187	800	34650	29003	26632	29669	55374	18609	14166	16601	54739	8939	9699	29962	23272	31012	293036	11913	11240	93890	2847	2832	122204	106278	9781	31275	56957	8945	34922	39342	18484	45480	3667	142489	8679	20051	60884	77165	72189	98896	58775	28915	31005	13161	24378	22725	20733	56246
Vina_2481_syl	27677	13519	4067	56031	35189	43976	31450	29340	11760	34926	8488	34066	15476	15380	24942	21907	32510	387626	6468	12001	44864	5826	2788	77674	86063	7240	26421	76454	4250	22655	24797	22270	22582	6197	149606	8886	17003	57846	75931	88126	140175	53667	28646	21969	7621	22814	16143	16548	79248
Vina_2482_syl	34384	10102	3457	51041	46785	37980	21751	27098	19381	42688	5844	24174	6121	4458	12674	12379	14417	342608	6258	13188	40075	5971	3112	59846	73506	9480	15649	28720	5143	18013	20667	12745	17518	3366	88968	9494	10604	52069	48572	33792	72956	46035	31446	41973	6531	12112	23754	17957	97703
Vina_2483_syl	7319	12132	73	10723	11462	19182	9345	14511	11199	14177	765	14487	5069	2909	3823	6039	3240	137243	3682	5787	3970	3973	2506	7539	31627	7569	6603	1464	655	11523	18751	6197	4251	2558	24241	6377	9057	2888	5431	10857	27447	6676	15383	2066	3342	5844	4014	7685	11976
Vpyr_2346_pyr	0	0	85	11611	11936	0	5869	350	0	4522	182	0	0	64	1955	0	5393	27988	229	518	0	243	0	24	225	309	6065	0	0	0	9529	97	58	965	1385	141	0	205	305	0	3442	1047	393	0	4148	8793	4368	2690	184
Vpyr_VP36_pyr	149	0	437	16289	12591	0	2862	1499	125	4638	196	0	0	3755	3330	0	2516	17091	228	429	0	86	0	951	225	0	3748	280	0	686	11158	97	58	501	44	141	140	145	2206	0	4024	338	670	0	2295	10115	2669	201	0
Vpyr_VP151_pyr	110	13017	668	10853	10625	0	3450	2538	0	3291	69	0	0	2811	3826	0	4309	11235	70	199	94	281	0	0	225	426	7466	145	0	112	10319	29	58	588	5179	307	149	450	60	0	142	517	1015	108	3392	9724	1286	2690	0
[truncated: 119 more columns]
